# Supplementary material for: mlh3 mutations in baker’s yeast alter meiotic recombination outcomes by increasing noncrossover events genome-wide
Source: PubMed Central journal article supplement (PMC5578695; doi:10.1371/journal.pgen.1006974), 2017-08-21
Supplement: pgen.1006974.s008.pdf [file pgen.1006974.s008.pdf]

**S1 Table. Yeast strains used in this study.**

| Strain     | Genotype                                                                                                         |                            |
|------------|------------------------------------------------------------------------------------------------------------------|----------------------------|
| EAY3252    | <i>MATa ho::hisG, ura3, leu2::hisG, trp1::hisG, ADE2, HIS4, CEN8Tomato::LEU2, MLH3, lys2::insE-A14</i>           |                            |
| EAY3255    | <i>MATa ho::hisG, ura3, leu2::hisG, trp1::hisG, ADE2, his4xB, CEN8Tomato::LEU2, mlh3Δ::NATMX, lys2::insE-A14</i> |                            |
|            |                                                                                                                  | amino acid substitution    |
| EAY3490-91 | Same as EAY3255, but <i>mlh3-1::KANMX</i>                                                                        | H4A,R6A,K7A                |
| EAY3492-93 | Same as EAY3255, but <i>mlh3-2::KANMX</i>                                                                        | E14A,R15A,K17A             |
| EAY3494-95 | Same as EAY3255, but <i>mlh3-3::KANMX</i>                                                                        | R30A,E31A                  |
| EAY3496-97 | Same as EAY3255, but <i>mlh3-4::KANMX</i>                                                                        | D38A,H40A                  |
| EAY3498-99 | Same as EAY3255, but <i>mlh3-5::KANMX</i>                                                                        | D59A,D60A                  |
| EAY3500-01 | Same as EAY3255, but <i>mlh3-6::KANMX</i>                                                                        | R66A,D68A                  |
| EAY3502-03 | Same as EAY3255, but <i>mlh3-7::KANMX</i>                                                                        | K80A,R82A,K83A             |
| EAY3504-05 | Same as EAY3255, but <i>mlh3-8::KANMX</i>                                                                        | R96A,D98A                  |
| EAY3506-07 | Same as EAY3255, but <i>mlh3-9::KANMX</i>                                                                        | K114A,K115A,K166A,D117A    |
| EAY3508-09 | Same as EAY3255, but <i>mlh3-10::KANMX</i>                                                                       | R124A,K125A                |
| EAY3510-11 | Same as EAY3255, but <i>mlh3-11::KANMX</i>                                                                       | R151A,R152A,K154A          |
| EAY3512-13 | Same as EAY3255, but <i>mlh3-12::KANMX</i>                                                                       | E162A,D163A                |
| EAY3514-15 | Same as EAY3255, but <i>mlh3-13::KANMX</i>                                                                       | R171A,R172A,R173A          |
| EAY3516-17 | Same as EAY3255, but <i>mlh3-14::KANMX</i>                                                                       | K176A,E177A,E178A          |
| EAY3518-19 | Same as EAY3255, but <i>mlh3-15::KANMX</i>                                                                       | K188A,D190A                |
| EAY3520-21 | Same as EAY3255, but <i>mlh3-16::KANMX</i>                                                                       | D209A,K210A,R212A          |
| EAY3522-23 | Same as EAY3255, but <i>mlh3-17::KANMX</i>                                                                       | R220A,K222A                |
| EAY3524-25 | Same as EAY3255, but <i>mlh3-18::KANMX</i>                                                                       | K230A, H231A               |
| EAY3526-27 | Same as EAY3255, but <i>mlh3-19::KANMX</i>                                                                       | K252A, K253A               |
| EAY3528-29 | Same as EAY3255, but <i>mlh3-20::KANMX</i>                                                                       | R273A, K275A, D276A        |
| EAY3530-31 | Same as EAY3255, but <i>mlh3-21::KANMX</i>                                                                       | R285A, R286A               |
| EAY3532-33 | Same as EAY3255, but <i>mlh3-22::KANMX</i>                                                                       | E307A, K308A               |
| EAY3534-35 | Same as EAY3255, but <i>mlh3-23::KANMX</i>                                                                       | K314A, K316A               |
| EAY3536-37 | Same as EAY3255, but <i>mlh3-24::KANMX</i>                                                                       | R323A, H325A               |
| EAY3538-39 | Same as EAY3255, but <i>mlh3-25::KANMX</i>                                                                       | D331A, R333A               |
| EAY3540-41 | Same as EAY3255, but <i>mlh3-26::KANMX</i>                                                                       | D339A, D340A               |
| EAY3542-43 | Same as EAY3255, but <i>mlh3-27::KANMX</i>                                                                       | K347A, K348A               |
| EAY3544-45 | Same as EAY3255, but <i>mlh3-28::KANMX</i>                                                                       | H354A, R356A               |
| EAY3546-47 | Same as EAY3255, but <i>mlh3-29::KANMX</i>                                                                       | D379A, K380A, D382A        |
| EAY3548-49 | Same as EAY3255, but <i>mlh3-30::KANMX</i>                                                                       | D399A, R401A               |
| EAY3550-51 | Same as EAY3255, but <i>mlh3-31::KANMX</i>                                                                       | K406A, R407A               |
| EAY3552-53 | Same as EAY3255, but <i>mlh3-32::KANMX</i>                                                                       | K414A, K416A               |
| EAY3554-55 | Same as EAY3255, but <i>mlh3-33::KANMX</i>                                                                       | E442A, K443A, K445A        |
| EAY3556-57 | Same as EAY3255, but <i>mlh3-34::KANMX</i>                                                                       | R448A, D450A               |
| EAY3558-59 | Same as EAY3255, but <i>mlh3-35::KANMX</i>                                                                       | E471D, D472A, D474A        |
| EAY3560-61 | Same as EAY3255, but <i>mlh3-36::KANMX</i>                                                                       | K492A, E494A               |
| EAY3562-63 | Same as EAY3255, but <i>mlh3-37::KANMX</i>                                                                       | D500A, K501A, K502A        |
| EAY3564-65 | Same as EAY3255, but <i>mlh3-38::KANMX</i>                                                                       | H514A, R516A               |
| EAY3566-67 | Same as EAY3255, but <i>mlh3-39::KANMX</i>                                                                       | D523A, H525A               |
| EAY3568-69 | Same as EAY3255, but <i>mlh3-40::KANMX</i>                                                                       | D528A, E529A, R530A        |
| EAY3570-71 | Same as EAY3255, but <i>mlh3-41::KANMX</i>                                                                       | R532A, E534A, E535A        |
| EAY3572-73 | Same as EAY3255, but <i>mlh3-42::KANMX</i>                                                                       | R552A, D553A, K555A, D556A |
| EAY3574-75 | Same as EAY3255, but <i>mlh3-43::KANMX</i>                                                                       | D562A, R563A, E565A        |
| EAY3576-77 | Same as EAY3255, but <i>mlh3-44::KANMX</i>                                                                       | K570A, H571A               |

|            |                                                                                                                                                                        |                            |
|------------|------------------------------------------------------------------------------------------------------------------------------------------------------------------------|----------------------------|
| EAY3578-79 | Same as EAY3255, but <i>mlh3-45::KANMX</i>                                                                                                                             | K577A, K578A               |
| EAY3580-81 | Same as EAY3255, but <i>mlh3-46::KANMX</i>                                                                                                                             | E596A, K598A               |
| EAY3582-83 | Same as EAY3255, but <i>mlh3-47::KANMX</i>                                                                                                                             | D611A, K612A, D613A        |
| EAY3584-85 | Same as EAY3255, but <i>mlh3-48::KANMX</i>                                                                                                                             | H622A, H624A, D625A        |
| EAY3586-87 | Same as EAY3255, but <i>mlh3-49::KANMX</i>                                                                                                                             | K627A, D628A, K630A, K631A |
| EAY3588-89 | Same as EAY3255, but <i>mlh3-50::KANMX</i>                                                                                                                             | H638A, E640A, H642A        |
| EAY3590-91 | Same as EAY3255, but <i>mlh3-51::KANMX</i>                                                                                                                             | D646A, K647A               |
| EAY3592-93 | Same as EAY3255, but <i>mlh3-52::KANMX</i>                                                                                                                             | H662A, E663A               |
| EAY3594-95 | Same as EAY3255, but <i>mlh3-53::KANMX</i>                                                                                                                             | D678A, E679A               |
| EAY3596-97 | Same as EAY3255, but <i>mlh3-54::KANMX</i>                                                                                                                             | R682A, E684A               |
| EAY3598-99 | Same as EAY3255, but <i>mlh3-55::KANMX</i>                                                                                                                             | R694A, H696A               |
| EAY3600-01 | Same as EAY3255, but <i>mlh3-56::KANMX</i>                                                                                                                             | E713A, K715A               |
| EAY3701-02 | Same as EAY3255, but <i>mlh3-57::KANMX</i>                                                                                                                             | C670A                      |
| EAY3703-04 | Same as EAY3255, but <i>mlh3-58::KANMX</i>                                                                                                                             | C701A                      |
| EAY3705-06 | Same as EAY3255, but <i>mlh3-59::KANMX</i>                                                                                                                             | H703A                      |
| EAY3707-08 | Same as EAY3255, but <i>mlh3-60::KANMX</i>                                                                                                                             | 716-DWSSFSKDYEI            |
|            |                                                                                                                                                                        |                            |
| EAY3819-20 | Same as EAY3255, but <i>mlh3-D523N::KANMX</i>                                                                                                                          |                            |
|            |                                                                                                                                                                        |                            |
| EAY3339    | <i>MATa ho::LYS2, lys2, ura3, leu2::hisG, trp1::hisG, THR1::m-Cerulean-TRP1</i>                                                                                        |                            |
| EAY3486    | Same as EAY3339, but <i>mlh3Δ::NATMX</i>                                                                                                                               |                            |
|            |                                                                                                                                                                        |                            |
| EAY1112    | <i>MATa ho::hisG, trp1::hisG, leu2::hisG, lys2, ura3, ade2::hisG, his3Δ::hisG, TRP1insertion@CENXV</i>                                                                 |                            |
| EAY1848    | Same as EAY1112, but <i>mlh3Δ::KANMX</i>                                                                                                                               |                            |
| EAY3712    | Same as EAY1112, but <i>mlh3Δ::URA3</i>                                                                                                                                |                            |
| EAY3713-14 | Same as EAY1112, but <i>mlh3-6::KANMX</i>                                                                                                                              |                            |
| EAY3715-16 | Same as EAY1112, but <i>mlh3-23::KANMX</i>                                                                                                                             |                            |
| EAY3717-18 | Same as EAY1112, but <i>mlh3-32::KANMX</i>                                                                                                                             |                            |
| EAY3719-20 | Same as EAY1112, but <i>mlh3-42::KANMX</i>                                                                                                                             |                            |
| EAY3721-22 | Same as EAY1112, but <i>mlh3-45::KANMX</i>                                                                                                                             |                            |
| EAY3723-24 | Same as EAY1112, but <i>mlh3-54::KANMX</i>                                                                                                                             |                            |
|            |                                                                                                                                                                        |                            |
| EAY2413    | <i>MATa trp1::hisG, leu2::hisG, ho::hisG, ura3, lys2, URA3insertion@CENXV, LEU2insertion@chromXV, LYS2 insertion at position 505193 on chromosome XV, mlh3Δ::NATMX</i> |                            |
|            |                                                                                                                                                                        |                            |
| S288c      | <i>MATa ho lys5</i>                                                                                                                                                    |                            |
| YJM789     | <i>MATa ho::hisG lys2 cyh</i>                                                                                                                                          |                            |
| KTY618     | Same as YJM789, but <i>SK1-MLH1::natMX4, mlh3Δ::kanMX4</i>                                                                                                             |                            |
| KTY610     | Same as S288c, but <i>SK1-MLH3::kanMX4, mlh1Δ::hphMX4</i>                                                                                                              |                            |
| KTY616     | Same as S288c, but <i>SK1-mlh3-23::kanMX4, mlh1Δ::hphMX4</i>                                                                                                           |                            |
| KTY614     | Same as S288c, but <i>SK1-mlh3-32::kanMX4, mlh1Δ::hphMX4</i>                                                                                                           |                            |
| KTY621     | Same as S288c, but <i>SK1-mlh3-D523N::kanMX4, mlh1Δ::hphMX4</i>                                                                                                        |                            |
| KTY626     | Same as S288c, but <i>mlh3Δ::kanMX4, mlh1Δ::hphMX4</i>                                                                                                                 |                            |

---

EAY3252, EAY3255 and derivatives, and EAY3486 are SK1 strains that contain spore autonomous fluorescent markers described in Thacker et al. [56]. EAY1112 and EAY2413 contain chromosome XV markers described in Argueso et al. [7]. KTY strains were used for whole genome recombination mapping as described in Krishnaprasad et al. [64] and Oke et al. [34].
