# Supplementary material for: mlh3 mutations in baker’s yeast alter meiotic recombination outcomes by increasing noncrossover events genome-wide
Source: PubMed Central journal article supplement (PMC5578695; doi:10.1371/journal.pgen.1006974), 2017-08-21
Supplement: pgen.1006974.s009.pdf [file pgen.1006974.s009.pdf]

**S2 Table. Diploid strains used to measure % tetratype, spore viability, meiotic progression, genetic map distances and for whole genome recombination mapping.**

| Diploid strain                                                                                            | Relevant genotype                           |
|-----------------------------------------------------------------------------------------------------------|---------------------------------------------|
| Spore autonomous fluorescent protein assay [56], meiotic progression assay [93], and Sgs1 overexpression. |                                             |
| EAY3252/EAY3486                                                                                           | <i>MLH3/mlh3Δ</i>                           |
| EAY3255/EAY3486                                                                                           | <i>mlh3Δ/mlh3Δ</i>                          |
| EAY3490 to EAY3708/EAY3486                                                                                | <i>mlh3-1 to mlh3-60/mlh3Δ</i>              |
| EAY3339/EAY3552-53                                                                                        | <i>MLH3/mlh3-32</i>                         |
| EAY3819-20/EAY3486                                                                                        | <i>mlh3-D523N/mlh3Δ</i>                     |
| Tetrad analysis [7]                                                                                       |                                             |
| EAY1112/EAY2413                                                                                           | <i>MLH3/mlh3Δ</i>                           |
| EAY1848/EAY2413                                                                                           | <i>mlh3Δ/mlh3Δ</i>                          |
| EAY3713-14/EAY2413                                                                                        | <i>mlh3-6/mlh3Δ</i>                         |
| EAY3715-16/EAY2413                                                                                        | <i>mlh3-23/mlh3Δ</i>                        |
| EAY3717-18/EAY2413                                                                                        | <i>mlh3-32/mlh3Δ</i>                        |
| EAY3719-20/EAY2413                                                                                        | <i>mlh3-42/mlh3Δ</i>                        |
| EAY3721-22/EAY2413                                                                                        | <i>mlh3-45/mlh3Δ</i>                        |
| EAY3723-24/EAY2413                                                                                        | <i>mlh3-54/mlh3Δ</i>                        |
| Whole genome recombination mapping [34, 64]                                                               |                                             |
| KTY618/KTY610                                                                                             | <i>SK1-MLH1/mlh1Δ, SK1-MLH3/mlh3Δ</i>       |
| KTY618/KTY616                                                                                             | <i>SK1-MLH1/mlh1Δ, SK1-mlh3-23/mlh3Δ</i>    |
| KTY618/KTY614                                                                                             | <i>SK1-MLH1/mlh1Δ, SK1-mlh3-32/mlh3Δ</i>    |
| KTY618/KTY621                                                                                             | <i>SK1-MLH1/mlh1Δ, SK1-mlh3-D523N/mlh3Δ</i> |
| KTY618/KTY626                                                                                             | <i>SK1-MLH1/mlh1Δ, mlh3Δ/mlh3Δ</i>          |

The indicated haploid strains were mated to form the diploids with the relevant genotype shown.
