# Supplementary material for: mlh3 mutations in baker’s yeast alter meiotic recombination outcomes by increasing noncrossover events genome-wide
Source: PubMed Central journal article supplement (PMC5578695; doi:10.1371/journal.pgen.1006974), 2017-08-21
Supplement: pgen.1006974.s010.pdf [file pgen.1006974.s010.pdf]

**S3 Table. Plasmids used in this study.****A. *MLH3* mutagenesis plasmids**


---

|         | allele         |
|---------|----------------|
| pEAI254 | <i>MLH3</i>    |
| pEAI325 | <i>mlh3-1</i>  |
| pEAI326 | <i>mlh3-2</i>  |
| pEAI327 | <i>mlh3-3</i>  |
| pEAI328 | <i>mlh3-4</i>  |
| pEAI329 | <i>mlh3-5</i>  |
| pEAI330 | <i>mlh3-6</i>  |
| pEAI331 | <i>mlh3-7</i>  |
| pEAI332 | <i>mlh3-8</i>  |
| pEAI333 | <i>mlh3-9</i>  |
| pEAI334 | <i>mlh3-10</i> |
| pEAI335 | <i>mlh3-11</i> |
| pEAI336 | <i>mlh3-12</i> |
| pEAI337 | <i>mlh3-13</i> |
| pEAI338 | <i>mlh3-14</i> |
| pEAI339 | <i>mlh3-15</i> |
| pEAI340 | <i>mlh3-16</i> |
| pEAI341 | <i>mlh3-17</i> |
| pEAI342 | <i>mlh3-18</i> |
| pEAI343 | <i>mlh3-19</i> |
| pEAI344 | <i>mlh3-20</i> |
| pEAI345 | <i>mlh3-21</i> |
| pEAI346 | <i>mlh3-22</i> |
| pEAI347 | <i>mlh3-23</i> |
| pEAI348 | <i>mlh3-24</i> |
| pEAI349 | <i>mlh3-25</i> |
| pEAI350 | <i>mlh3-26</i> |
| pEAI351 | <i>mlh3-27</i> |
| pEAI352 | <i>mlh3-28</i> |
| pEAI353 | <i>mlh3-29</i> |
| pEAI354 | <i>mlh3-30</i> |
| pEAI355 | <i>mlh3-31</i> |
| pEAI356 | <i>mlh3-32</i> |
| pEAI357 | <i>mlh3-33</i> |
| pEAI358 | <i>mlh3-34</i> |
| pEAI359 | <i>mlh3-35</i> |
| pEAI360 | <i>mlh3-36</i> |
| pEAI361 | <i>mlh3-37</i> |
| pEAI362 | <i>mlh3-38</i> |
| pEAI363 | <i>mlh3-39</i> |
| pEAI364 | <i>mlh3-40</i> |
| pEAI365 | <i>mlh3-41</i> |
| pEAI366 | <i>mlh3-42</i> |
| pEAI367 | <i>mlh3-43</i> |
| pEAI368 | <i>mlh3-44</i> |
| pEAI369 | <i>mlh3-45</i> |
| pEAI370 | <i>mlh3-46</i> |

|         |                   |
|---------|-------------------|
| pEAI371 | <i>mlh3-47</i>    |
| pEAI372 | <i>mlh3-48</i>    |
| pEAI373 | <i>mlh3-49</i>    |
| pEAI374 | <i>mlh3-50</i>    |
| pEAI375 | <i>mlh3-51</i>    |
| pEAI376 | <i>mlh3-52</i>    |
| pEAI377 | <i>mlh3-53</i>    |
| pEAI378 | <i>mlh3-54</i>    |
| pEAI379 | <i>mlh3-55</i>    |
| pEAI380 | <i>mlh3-56</i>    |
| pEAI394 | <i>mlh3-57</i>    |
| pEAI395 | <i>mlh3-58</i>    |
| pEAI396 | <i>mlh3-59</i>    |
| pEAI397 | <i>mlh3-60</i>    |
| pEAI252 | <i>mlh3-D523N</i> |

#### B. Two-hybrid plasmids

|         | relevant genotype                       |                |
|---------|-----------------------------------------|----------------|
| pBTM116 | <i>pADH1-lexA</i> , dummy vector        | 2 $\mu$ , TRP1 |
| pEAM105 | <i>pADH1-lexA-MLH1<sub>SK1</sub></i>    | 2 $\mu$ , TRP1 |
| pGAD424 | <i>pADH1-GAL4AD</i>                     | 2 $\mu$ , LEU2 |
| pEAM234 | <i>pADH1-GAL4-AD-MLH3<sub>SK1</sub></i> | 2 $\mu$ , LEU2 |
| pEAM235 | <i>pADH1-GAL4-AD-mlh3-39</i>            | 2 $\mu$ , LEU2 |
| pEAM236 | <i>pADH1-GAL4-AD-mlh3-40</i>            | 2 $\mu$ , LEU2 |
| pEAM237 | <i>pADH1-GAL4-AD-mlh3-41</i>            | 2 $\mu$ , LEU2 |
| pEAM238 | <i>pADH1-GAL4-AD-mlh3-42</i>            | 2 $\mu$ , LEU2 |
| pEAM241 | <i>pADH1-GAL4-AD-mlh3-45</i>            | 2 $\mu$ , LEU2 |
| pEAM242 | <i>pADH1-GAL4-AD-mlh3-48</i>            | 2 $\mu$ , LEU2 |
| pEAM244 | <i>pADH1-GAL4-AD-mlh3-54</i>            | 2 $\mu$ , LEU2 |
| pEAM245 | <i>pADH1-GAL4-AD-mlh3-60</i>            | 2 $\mu$ , LEU2 |

#### C. 2 $\mu$ URA3 plasmids

|                 | Relevant genotype           |
|-----------------|-----------------------------|
| pRS426 (pEAO34) | Dummy vector                |
| pEAM266         | <i>SGS1</i>                 |
| pEAM270         | <i>sgs1-K706A (sgs1-hd)</i> |

---

A. All *MLH3* mutagenesis plasmids are derived from pEAI254, a 7.8 kb *MLH3<sub>SK1</sub>::KANMX* integrating vector. pEAI254 was mutagenized by QuickChange to create the alleles listed. The DNA sequence of the entire ORF, and 70 bp upstream and 150 bp downstream, were confirmed by DNA sequencing using primers EAO318, EAO319, EAO1778 and EAO321. B. For the two-hybrid analysis, pEAM105 contains the entire *MLH1* gene derived from the SK1 strain inserted immediately after the *lexA* binding domain in pBTM116. All *GAL4* activating domain-*mlh3* plasmids are derived from pEAM234, which contains DNA sequence encoding SK1 *MLH3* amino acids 481 to 715 inserted immediately after the *GAL4* activating domain in pGAD424. C. *SGS1* was cloned into pRS426 to make pEAM266 as described in the Methods. Site directed mutagenesis of pEAM266 was performed to make pEAM270 carrying the *sgs1* helicase defective allele as described in the Methods.
