# Supplementary material for: mlh3 mutations in baker’s yeast alter meiotic recombination outcomes by increasing noncrossover events genome-wide
Source: PubMed Central journal article supplement (PMC5578695; doi:10.1371/journal.pgen.1006974), 2017-08-21
Supplement: pgen.1006974.s011.pdf [file pgen.1006974.s011.pdf]

**S4 Table. Genetic map distances for *mlh3* separation of function mutants on chromosome XV from single spores and tetrads.**

| Genotype         | n    | Single Spores |      |      | N   | Tetrads |     |     |      | SE  |
|------------------|------|---------------|------|------|-----|---------|-----|-----|------|-----|
|                  |      | Par.          | Rec. | cM   |     | PD      | TT  | NPD | cM   |     |
| <i>URA3-LEU2</i> |      |               |      |      |     |         |     |     |      |     |
| <i>MLH3</i>      | 896  | 641           | 255  | 28.5 | 205 | 93      | 106 | 4   | 32.0 | 3.2 |
| <i>mlh3Δ</i>     | 1028 | 876           | 152  | 14.8 | 210 | 146     | 61  | 2   | 17.5 | 2.5 |
| <i>mlh3-6</i>    | 907  | 691           | 216  | 23.8 | 205 | 110     | 84  | 5   | 28.6 | 3.5 |
| <i>mlh3-23</i>   | 480  | 391           | 89   | 18.5 | 105 | 69      | 32  | 1   | 18.6 | 3.6 |
| <i>mlh3-32</i>   | 995  | 836           | 159  | 16.0 | 205 | 140     | 61  | 1   | 16.6 | 2.1 |
| <i>mlh3-42</i>   | 731  | 551           | 180  | 24.6 | 154 | 79      | 73  | 1   | 25.8 | 2.7 |
| <i>mlh3-45</i>   | 925  | 709           | 216  | 23.4 | 204 | 103     | 99  | 0   | 24.5 | 1.8 |
| <i>mlh3-54</i>   | 694  | 533           | 161  | 23.2 | 155 | 79      | 70  | 2   | 27.2 | 3.3 |
| <i>LEU2-LYS2</i> |      |               |      |      |     |         |     |     |      |     |
| <i>MLH3</i>      | 896  | 680           | 216  | 24.1 | 205 | 103     | 99  | 1   | 25.9 | 2.2 |
| <i>mlh3Δ</i>     | 1028 | 923           | 105  | 10.2 | 210 | 166     | 43  | 0   | 10.3 | 1.4 |
| <i>mlh3-6</i>    | 907  | 738           | 169  | 18.6 | 205 | 129     | 68  | 2   | 20.1 | 2.6 |
| <i>mlh3-23</i>   | 480  | 397           | 83   | 17.3 | 105 | 69      | 33  | 0   | 16.2 | 2.3 |
| <i>mlh3-32</i>   | 995  | 854           | 141  | 14.2 | 205 | 144     | 58  | 0   | 14.4 | 1.6 |
| <i>mlh3-42</i>   | 731  | 564           | 167  | 22.9 | 154 | 81      | 71  | 1   | 25.2 | 2.7 |
| <i>mlh3-45</i>   | 925  | 739           | 186  | 20.1 | 204 | 123     | 78  | 1   | 20.8 | 2.2 |
| <i>mlh3-54</i>   | 694  | 550           | 144  | 20.8 | 155 | 90      | 61  | 0   | 20.2 | 2.0 |
| <i>LYS2-ADE2</i> |      |               |      |      |     |         |     |     |      |     |
| <i>MLH3</i>      | 896  | 815           | 81   | 9.0  | 205 | 168     | 35  | 0   | 8.6  | 1.3 |
| <i>mlh3Δ</i>     | 1028 | 988           | 40   | 3.9  | 210 | 193     | 16  | 0   | 3.8  | 0.9 |
| <i>mlh3-6</i>    | 907  | 812           | 95   | 10.5 | 205 | 158     | 41  | 0   | 10.3 | 1.4 |
| <i>mlh3-23</i>   | 480  | 454           | 26   | 5.4  | 105 | 92      | 10  | 0   | 4.9  | 1.5 |
| <i>mlh3-32</i>   | 995  | 930           | 65   | 6.5  | 205 | 176     | 26  | 0   | 6.4  | 1.2 |
| <i>mlh3-42</i>   | 731  | 663           | 68   | 9.3  | 154 | 124     | 29  | 0   | 9.5  | 1.6 |
| <i>mlh3-45</i>   | 925  | 856           | 69   | 7.5  | 204 | 172     | 29  | 1   | 8.7  | 1.9 |
| <i>mlh3-54</i>   | 694  | 627           | 67   | 9.7  | 155 | 121     | 30  | 0   | 9.9  | 1.6 |
| <i>ADE2-HIS3</i> |      |               |      |      |     |         |     |     |      |     |
| <i>MLH3</i>      | 896  | 560           | 336  | 37.5 | 205 | 63      | 129 | 11  | 48.0 | 4.5 |
| <i>mlh3Δ</i>     | 1028 | 829           | 199  | 19.4 | 210 | 130     | 79  | 0   | 18.9 | 1.7 |
| <i>mlh3-6</i>    | 907  | 665           | 242  | 26.7 | 205 | 98      | 95  | 6   | 32.9 | 3.8 |
| <i>mlh3-23</i>   | 480  | 352           | 128  | 26.7 | 105 | 46      | 55  | 1   | 29.9 | 3.6 |
| <i>mlh3-32</i>   | 995  | 811           | 184  | 18.5 | 205 | 129     | 70  | 3   | 21.8 | 2.9 |
| <i>mlh3-42</i>   | 731  | 491           | 241  | 33.0 | 154 | 58      | 89  | 6   | 40.8 | 4.7 |
| <i>mlh3-45</i>   | 925  | 650           | 275  | 29.7 | 204 | 85      | 116 | 1   | 30.2 | 2.2 |
| <i>mlh3-54</i>   | 694  | 469           | 225  | 32.4 | 155 | 58      | 88  | 5   | 39.1 | 4.4 |

All *mlh3* mutants are isogenic derivatives of EAY1112/EAY2413 (S2 Table; Methods). For single spores, recombination frequencies (recombinant spores/total spores) were multiplied by 100 to yield genetic map distances (cM). For tetrads, genetic distance in centimorgans (cM) was calculated using the RANA software without considering aberrant segregants (Argueso et al. [7]). The Stahl Laboratory Online Tools website (<http://molbio.uoregon.edu/~fstahl/>) was used to calculate standard error (SE) around the genetic distance for tetrads. n; number of single spores, N; four spore viable tetrads analyzed; Par, parental single spores; Rec, recombinant single spores.
