# Supplementary material for: mlh3 mutations in baker’s yeast alter meiotic recombination outcomes by increasing noncrossover events genome-wide
Source: PubMed Central journal article supplement (PMC5578695; doi:10.1371/journal.pgen.1006974), 2017-08-21
Supplement: pgen.1006974.s012.pdf [file pgen.1006974.s012.pdf]

**S5 Table. Sequencing statistics for spores derived from wild type, *mlh3-23*, *mlh3-32*, *mlh3-D523N* and *mlh3Δ* in S288c/YJM789 hybrid bearing SK1-*MLH1/MLH3* alleles.**

| Spore ID          | SNPs genotyped | Coverage Depth (X) |
|-------------------|----------------|--------------------|
| <i>wt_2a</i>      | 73593          | 66.40              |
| <i>wt_2b</i>      | 74058          | 79.95              |
| <i>wt_2c</i>      | 73682          | 70.88              |
| <i>wt_2d</i>      | 73565          | 73.79              |
| <i>wt_5a</i>      | 71120          | 31.09              |
| <i>wt_5b</i>      | 74269          | 71.53              |
| <i>wt_5c</i>      | 71985          | 40.23              |
| <i>wt_5d</i>      | 71278          | 39.96              |
| <i>wt_6a</i>      | 73967          | 31.05              |
| <i>wt_6b</i>      | 73838          | 39.35              |
| <i>wt_6c</i>      | 73779          | 40.65              |
| <i>wt_6d</i>      | 72914          | 30.12              |
| <i>wt_7a</i>      | 72106          | 17.09              |
| <i>wt_7b</i>      | 70109          | 10.83              |
| <i>wt_7c</i>      | 71589          | 12.98              |
| <i>wt_7d</i>      | 73637          | 48.78              |
| <i>wt_8a</i>      | 73934          | 26.02              |
| <i>wt_8b</i>      | 72929          | 27.20              |
| <i>wt_8c</i>      | 72853          | 23.29              |
| <i>wt_8d</i>      | 72057          | 20.39              |
| <i>wt_9a</i>      | 72729          | 25.17              |
| <i>wt_9b</i>      | 73773          | 34.92              |
| <i>wt_9c</i>      | 73366          | 29.59              |
| <i>wt_9d</i>      | 72637          | 27.90              |
| <i>wt_10a</i>     | 73326          | 88.63              |
| <i>wt_10b</i>     | 73176          | 25.16              |
| <i>wt_10c</i>     | 73198          | 30.37              |
| <i>wt_10d</i>     | 73612          | 22.72              |
| <i>wt_11a</i>     | 73020          | 40.30              |
| <i>wt_11b</i>     | 73309          | 43.98              |
| <i>wt_11c</i>     | 73553          | 31.89              |
| <i>wt_11d</i>     | 73034          | 37.50              |
| <i>wt_12a</i>     | 72904          | 30.86              |
| <i>wt_12b</i>     | 73006          | 20.06              |
| <i>wt_12c</i>     | 74485          | 29.35              |
| <i>wt_12d</i>     | 74593          | 28.81              |
| <i>wt_13a</i>     | 73772          | 39.24              |
| <i>wt_13b</i>     | 73934          | 46.79              |
| <i>wt_13c</i>     | 73051          | 37.72              |
| <i>wt_13d</i>     | 73012          | 29.61              |
| <i>mlh3_23_6a</i> | 72821          | 26.00              |
| <i>mlh3_23_6b</i> | 73731          | 30.46              |
| <i>mlh3_23_6c</i> | 74242          | 74.35              |
| <i>mlh3_23_6d</i> | 73587          | 38.45              |
| <i>mlh3_23_7a</i> | 73307          | 31.01              |
| <i>mlh3_23_7b</i> | 72910          | 30.35              |
| <i>mlh3_23_7c</i> | 74113          | 26.86              |

|                    |       |        |
|--------------------|-------|--------|
| <i>mlh3_23_7d</i>  | 73731 | 33.87  |
| <i>mlh3_23_8a</i>  | 73652 | 42.29  |
| <i>mlh3_23_8b</i>  | 73500 | 23.72  |
| <i>mlh3_23_8c</i>  | 73523 | 35.44  |
| <i>mlh3_23_8d</i>  | 73019 | 27.51  |
| <i>mlh3_23_9a</i>  | 72890 | 24.92  |
| <i>mlh3_23_9b</i>  | 72762 | 39.19  |
| <i>mlh3_23_9c</i>  | 73009 | 23.54  |
| <i>mlh3_23_9d</i>  | 73289 | 28.28  |
| <i>mlh3_23_10a</i> | 74434 | 34.56  |
| <i>mlh3_23_10b</i> | 71249 | 13.69  |
| <i>mlh3_23_10c</i> | 72944 | 27.91  |
| <i>mlh3_23_10d</i> | 73138 | 36.67  |
| <i>mlh3_23_11a</i> | 74791 | 44.61  |
| <i>mlh3_23_11b</i> | 72578 | 39.03  |
| <i>mlh3_23_11c</i> | 73377 | 30.72  |
| <i>mlh3_23_11d</i> | 74015 | 35.07  |
| <i>mlh3_23_12a</i> | 72112 | 20.22  |
| <i>mlh3_23_12b</i> | 72717 | 19.77  |
| <i>mlh3_23_12c</i> | 72680 | 23.84  |
| <i>mlh3_23_12d</i> | 72243 | 21.08  |
| <i>mlh3_32_6a</i>  | 73361 | 36.57  |
| <i>mlh3_32_6b</i>  | 73183 | 37.66  |
| <i>mlh3_32_6c</i>  | 72332 | 24.60  |
| <i>mlh3_32_6d</i>  | 71679 | 22.96  |
| <i>mlh3_32_7a</i>  | 72832 | 198.87 |
| <i>mlh3_32_7b</i>  | 71095 | 11.60  |
| <i>mlh3_32_7c</i>  | 73330 | 31.58  |
| <i>mlh3_32_7d</i>  | 73238 | 26.67  |
| <i>mlh3_32_8a</i>  | 72758 | 217.13 |
| <i>mlh3_32_8b</i>  | 70392 | 29.44  |
| <i>mlh3_32_8c</i>  | 70315 | 27.33  |
| <i>mlh3_32_8d</i>  | 72879 | 149.71 |
| <i>mlh3_32_9a</i>  | 74387 | 98.47  |
| <i>mlh3_32_9b</i>  | 63895 | 45.17  |
| <i>mlh3_32_9c</i>  | 72482 | 141.67 |
| <i>mlh3_32_9d</i>  | 73950 | 204.92 |
| <i>mlh3_32_11a</i> | 73202 | 29.09  |
| <i>mlh3_32_11b</i> | 73770 | 27.74  |
| <i>mlh3_32_11c</i> | 72274 | 34.69  |
| <i>mlh3_32_11d</i> | 73102 | 31.94  |
| <i>mlh3_32_12a</i> | 73497 | 41.42  |
| <i>mlh3_32_12b</i> | 72933 | 31.95  |
| <i>mlh3_32_12c</i> | 73648 | 32.22  |
| <i>mlh3_32_12d</i> | 73847 | 32.89  |
| <i>mlh3_32_13a</i> | 73579 | 34.68  |
| <i>mlh3_32_13b</i> | 73554 | 34.46  |
| <i>mlh3_32_13c</i> | 74400 | 71.42  |
| <i>mlh3_32_13d</i> | 72551 | 20.67  |
| <i>mlh3DN_1a</i>   | 74093 | 53.98  |
| <i>mlh3DN_1b</i>   | 74212 | 54.27  |

|                    |       |        |
|--------------------|-------|--------|
| <i>mlh3DN_1c</i>   | 74196 | 52.60  |
| <i>mlh3DN_1d</i>   | 74018 | 78.47  |
| <i>mlh3DN_2a</i>   | 73782 | 67.29  |
| <i>mlh3DN_2b</i>   | 73893 | 98.45  |
| <i>mlh3DN_2c</i>   | 73947 | 104.45 |
| <i>mlh3DN_2d</i>   | 74717 | 131.11 |
| <i>mlh3DN_3a</i>   | 74808 | 91.32  |
| <i>mlh3DN_3b</i>   | 73523 | 53.45  |
| <i>mlh3DN_3c</i>   | 73649 | 55.91  |
| <i>mlh3DN_3d</i>   | 73680 | 51.84  |
| <i>mlh3DN_4a</i>   | 73994 | 46.26  |
| <i>mlh3DN_4b</i>   | 74042 | 63.36  |
| <i>mlh3DN_4c</i>   | 74334 | 85.10  |
| <i>mlh3DN_4d</i>   | 74398 | 51.04  |
| <i>mlh3DN_5a</i>   | 74793 | 49.82  |
| <i>mlh3DN_5b</i>   | 74596 | 60.02  |
| <i>mlh3DN_5c</i>   | 74230 | 47.14  |
| <i>mlh3DN_5d</i>   | 73957 | 58.53  |
| <i>mlh3DN_6a</i>   | 74602 | 57.33  |
| <i>mlh3DN_6b</i>   | 74329 | 72.08  |
| <i>mlh3DN_6c</i>   | 74203 | 48.69  |
| <i>mlh3DN_6d</i>   | 74376 | 77.95  |
| <i>mlh3DN_7a</i>   | 74205 | 48.52  |
| <i>mlh3DN_7b</i>   | 74246 | 58.80  |
| <i>mlh3DN_7c</i>   | 74130 | 60.66  |
| <i>mlh3DN_7d</i>   | 73308 | 65.19  |
| <i>mlh3DN_8a</i>   | 73246 | 36.71  |
| <i>mlh3DN_8b</i>   | 74400 | 55.49  |
| <i>mlh3DN_8c</i>   | 74116 | 78.77  |
| <i>mlh3DN_8d</i>   | 73848 | 62.79  |
| <i>mlh3DN_9a</i>   | 74698 | 64.18  |
| <i>mlh3DN_9b</i>   | 74851 | 76.91  |
| <i>mlh3DN_9c</i>   | 73978 | 50.63  |
| <i>mlh3DN_9d</i>   | 73810 | 66.36  |
| <i>mlh3DN_10a</i>  | 73932 | 66.84  |
| <i>mlh3DN_10b</i>  | 74272 | 89.49  |
| <i>mlh3DN_10c</i>  | 74783 | 91.61  |
| <i>mlh3DN_10d</i>  | 74421 | 78.58  |
| <i>mlh3null_1a</i> | 72746 | 23.75  |
| <i>mlh3null_1b</i> | 71493 | 66.08  |
| <i>mlh3null_1c</i> | 73461 | 27.09  |
| <i>mlh3null_1d</i> | 73062 | 36.04  |
| <i>mlh3null_2a</i> | 73687 | 30.53  |
| <i>mlh3null_2b</i> | 73350 | 28.38  |
| <i>mlh3null_2c</i> | 70835 | 70.07  |
| <i>mlh3null_2d</i> | 71034 | 18.25  |
| <i>mlh3null_3a</i> | 72707 | 26.01  |
| <i>mlh3null_3b</i> | 73321 | 29.99  |
| <i>mlh3null_3c</i> | 74005 | 37.19  |
| <i>mlh3null_3d</i> | 72088 | 24.08  |
| <i>mlh3null_4a</i> | 74052 | 32.98  |

|                     |       |       |
|---------------------|-------|-------|
| <i>mlh3null_4b</i>  | 72938 | 49.10 |
| <i>mlh3null_4c</i>  | 74692 | 52.23 |
| <i>mlh3null_4d</i>  | 73792 | 32.23 |
| <i>mlh3null_5a</i>  | 73803 | 31.86 |
| <i>mlh3null_5b</i>  | 74048 | 33.79 |
| <i>mlh3null_5c</i>  | 72848 | 33.27 |
| <i>mlh3null_5d</i>  | 72772 | 21.49 |
| <i>mlh3null_6a</i>  | 71196 | 69.15 |
| <i>mlh3null_6b</i>  | 73701 | 38.79 |
| <i>mlh3null_6c</i>  | 71783 | 76.77 |
| <i>mlh3null_6d</i>  | 71928 | 19.94 |
| <i>mlh3null_7a</i>  | 73097 | 36.67 |
| <i>mlh3null_7b</i>  | 72210 | 36.42 |
| <i>mlh3null_7c</i>  | 75003 | 60.87 |
| <i>mlh3null_7d</i>  | 73297 | 35.11 |
| <i>mlh3null_8a</i>  | 73597 | 44.31 |
| <i>mlh3null_8b</i>  | 73050 | 56.57 |
| <i>mlh3null_8c</i>  | 73092 | 40.96 |
| <i>mlh3null_8d</i>  | 73375 | 41.63 |
| <i>mlh3null_9a</i>  | 73689 | 38.75 |
| <i>mlh3null_9b</i>  | 72537 | 41.30 |
| <i>mlh3null_9c</i>  | 73632 | 36.13 |
| <i>mlh3null_9d</i>  | 73622 | 34.73 |
| <i>mlh3null_10a</i> | 74117 | 34.20 |
| <i>mlh3null_10b</i> | 71858 | 30.54 |
| <i>mlh3null_10c</i> | 73608 | 39.18 |
| <i>mlh3null_10d</i> | 73109 | 36.95 |
