# Supplementary material for: mlh3 mutations in baker’s yeast alter meiotic recombination outcomes by increasing noncrossover events genome-wide
Source: PubMed Central journal article supplement (PMC5578695; doi:10.1371/journal.pgen.1006974), 2017-08-21
Supplement: pgen.1006974.s013.pdf [file pgen.1006974.s013.pdf]

**S6 Table.** Crossovers (CO) and noncrossovers (NCO) in tetrads of wild-type, *mlh3-23*, *mlh3-32*, *mlh3-D523N* and *mlh3Δ*.

| Tetrad_ID          | CO (E2+E3) | NCO (E1) |
|--------------------|------------|----------|
| <i>wt_2</i>        | 73         | 53       |
| <i>wt_5</i>        | 82         | 43       |
| <i>wt_6</i>        | 71         | 37       |
| <i>wt_7</i>        | 100        | 47       |
| <i>wt_8</i>        | 78         | 37       |
| <i>wt_9</i>        | 76         | 44       |
| <i>wt_10</i>       | 83         | 46       |
| <i>wt_11</i>       | 81         | 28       |
| <i>wt_12</i>       | 85         | 34       |
| <i>wt_13</i>       | 82         | 38       |
| <i>mlh3_23_6</i>   | 92         | 63       |
| <i>mlh3_23_7</i>   | 73         | 53       |
| <i>mlh3_23_8</i>   | 63         | 43       |
| <i>mlh3_23_9</i>   | 84         | 49       |
| <i>mlh3_23_10</i>  | 73         | 55       |
| <i>mlh3_23_11</i>  | 112        | 46       |
| <i>mlh3_23_12</i>  | 70         | 51       |
| <i>mlh3_32_6</i>   | 64         | 51       |
| <i>mlh3_32_7</i>   | 72         | 45       |
| <i>mlh3_32_8</i>   | 58         | 64       |
| <i>mlh3_32_9</i>   | 56         | 64       |
| <i>mlh3_32_11</i>  | 53         | 50       |
| <i>mlh3_32_12</i>  | 73         | 55       |
| <i>mlh3_32_13</i>  | 80         | 61       |
| <i>mlh3DN_1</i>    | 61         | 45       |
| <i>mlh3DN_2</i>    | 51         | 53       |
| <i>mlh3DN_3</i>    | 58         | 49       |
| <i>mlh3DN_4</i>    | 66         | 43       |
| <i>mlh3DN_5</i>    | 58         | 55       |
| <i>mlh3DN_6</i>    | 66         | 58       |
| <i>mlh3DN_7</i>    | 55         | 57       |
| <i>mlh3DN_8</i>    | 64         | 44       |
| <i>mlh3DN_9</i>    | 52         | 46       |
| <i>mlh3DN_10</i>   | 59         | 52       |
| <i>mlh3null_1</i>  | 44         | 54       |
| <i>mlh3null_2</i>  | 36         | 56       |
| <i>mlh3null_3</i>  | 47         | 46       |
| <i>mlh3null_4</i>  | 53         | 49       |
| <i>mlh3null_5</i>  | 48         | 44       |
| <i>mlh3null_6</i>  | 55         | 57       |
| <i>mlh3null_7</i>  | 55         | 58       |
| <i>mlh3null_8</i>  | 52         | 60       |
| <i>mlh3null_9</i>  | 50         | 72       |
| <i>mlh3null_10</i> | 52         | 56       |

Crossovers are E2+E3 events and noncrossovers are E1 events [34].
