# Supplementary material for: mlh3 mutations in baker’s yeast alter meiotic recombination outcomes by increasing noncrossover events genome-wide
Source: PubMed Central journal article supplement (PMC5578695; doi:10.1371/journal.pgen.1006974), 2017-08-21
Supplement: pgen.1006974.s014.pdf [file pgen.1006974.s014.pdf]

**S7 Table. Average crossovers (CO) and noncrossovers (NCO) per chromosome for WT (wild type), *mlh3-23*, *mlh3-32*, *mlh3-D523N* and *mlh3Δ* mutants.**

| <b>Chromosome</b> | <b>WT</b>   | <b><i>mlh3-23</i></b> | <b><i>mlh3-32</i></b> | <b><i>mlh3-D523N</i></b> | <b><i>mlh3Δ</i></b> |
|-------------------|-------------|-----------------------|-----------------------|--------------------------|---------------------|
| I                 | 1.6         | 1.4                   | 1.4                   | 1.1                      | 1.7                 |
| II                | 4.3         | 5.9                   | 5.0                   | 4.7                      | 3.4                 |
| III               | 3.1         | 3.0                   | 1.7                   | 2.4                      | 1.9                 |
| IV                | 9.5         | 8.6                   | 8.1                   | 6.1                      | 6.3                 |
| V                 | 3.4         | 4.4                   | 2.9                   | 2.2                      | 2.5                 |
| VI                | 2.3         | 2.1                   | 1.9                   | 2.0                      | 1.6                 |
| VII               | 7.0         | 8.0                   | 4.0                   | 5.3                      | 4.4                 |
| VIII              | 4.7         | 4.1                   | 3.1                   | 2.7                      | 3.1                 |
| IX                | 3.2         | 2.9                   | 3.0                   | 2.5                      | 2.3                 |
| X                 | 5.3         | 4.7                   | 3.1                   | 3.1                      | 3.3                 |
| XI                | 4.7         | 5.0                   | 4.0                   | 3.8                      | 3.5                 |
| XII               | 7.3         | 7.0                   | 5.3                   | 5.2                      | 4.8                 |
| XIII              | 6.5         | 5.0                   | 6.0                   | 4.3                      | 4.3                 |
| XIV               | 4.6         | 5.3                   | 4.1                   | 3.7                      | 2.8                 |
| XV                | 7.5         | 7.0                   | 5.7                   | 4.8                      | 5.1                 |
| XVI               | 6.1         | 6.6                   | 5.7                   | 5.1                      | 4.2                 |
| <b>Total_CO</b>   | <b>81.0</b> | <b>81.0</b>           | <b>65.0</b>           | <b>59.0</b>              | <b>55.0</b>         |

  

| <b>Chromosome</b> | <b>WT</b>   | <b><i>mlh3-23</i></b> | <b><i>mlh3-32</i></b> | <b><i>mlh3-D523N</i></b> | <b><i>mlh3Δ</i></b> |
|-------------------|-------------|-----------------------|-----------------------|--------------------------|---------------------|
| I                 | 1.2         | 1.3                   | 1.0                   | 1.0                      | 1.4                 |
| II                | 4.0         | 4.1                   | 4.0                   | 4.1                      | 3.3                 |
| III               | 0.8         | 0.7                   | 2.1                   | 1.9                      | 0.9                 |
| IV                | 4.5         | 7.1                   | 7.3                   | 5.9                      | 5.6                 |
| V                 | 2.6         | 3.3                   | 2.3                   | 3.7                      | 2.9                 |
| VI                | 1.3         | 1.4                   | 1.1                   | 0.8                      | 1.4                 |
| VII               | 4.3         | 4.0                   | 5.9                   | 4.1                      | 5.9                 |
| VIII              | 1.4         | 1.4                   | 3.1                   | 2.3                      | 1.8                 |
| IX                | 1.0         | 1.9                   | 2.0                   | 1.9                      | 1.7                 |
| X                 | 1.9         | 3.6                   | 3.7                   | 3.1                      | 3.5                 |
| XI                | 1.8         | 2.1                   | 3.3                   | 2.4                      | 2.1                 |
| XII               | 2.5         | 3.9                   | 5.7                   | 4.1                      | 4.3                 |
| XIII              | 3.3         | 5.7                   | 3.7                   | 3.2                      | 3.4                 |
| XIV               | 3.2         | 2.6                   | 3.0                   | 2.9                      | 2.9                 |
| XV                | 3.4         | 4.9                   | 4.1                   | 6.1                      | 4.8                 |
| XVI               | 3.5         | 3.4                   | 3.3                   | 2.7                      | 3.3                 |
| <b>Total_NCO</b>  | <b>41.0</b> | <b>51.0</b>           | <b>56.0</b>           | <b>50.0</b>              | <b>49.0</b>         |

---

Crossovers are E2+E3 events and noncrossovers are E1 events [34].
