# Supplementary material for: mlh3 mutations in baker’s yeast alter meiotic recombination outcomes by increasing noncrossover events genome-wide
Source: PubMed Central journal article supplement (PMC5578695; doi:10.1371/journal.pgen.1006974), 2017-08-21
Supplement: pgen.1006974.s015.pdf [file pgen.1006974.s015.pdf]

**S8 Table. Gene conversion tract lengths in *mlh3Δ*, Wild type, *mlh3-23*, *mlh3-32* and *mlh3-D523N* mutants.**

| Strain            | E2 median (kb) | P value | E1 median (kb) | P value | E4 median (kb) | P value |
|-------------------|----------------|---------|----------------|---------|----------------|---------|
| <i>mlh3Δ</i>      | 2.19           |         | 1.50           |         | 2.28           |         |
| Wild type         | 1.79           | 0.005   | 1.46           | 0.51    | 3.01           | 0.37    |
| <i>mlh3-23</i>    | 1.96           | 0.18    | 1.42           | 0.37    | 2.03           | 0.69    |
| <i>mlh3-32</i>    | 1.84           | 0.034   | 1.34           | 0.045   | 2.23           | 0.65    |
| <i>mlh3-D523N</i> | 1.96           | 0.49    | 1.48           | 0.43    | 2.59           | 0.40    |

E1, E2, E4 are classified by groupEvents [34]. P-values show statistical significance of difference in median CO and NCO gene conversion tract lengths of wild-type and *mlh3* alleles compared to *mlh3Δ* using the Wilcoxon rank sum test (Methods).
