# Supplementary material for: mlh3 mutations in baker’s yeast alter meiotic recombination outcomes by increasing noncrossover events genome-wide
Source: PubMed Central journal article supplement (PMC5578695; doi:10.1371/journal.pgen.1006974), 2017-08-21
Supplement: pgen.1006974.s016.pdf [file pgen.1006974.s016.pdf]

**S9 Table. Summary of all event categories in wt, *mlh3-23*, *mlh3-32*, *mlh3-D523N* and *mlh3Δ*.**

|                        | <b>WT</b> | <b><i>mlh3-23</i></b> | <b><i>mlh3-32</i></b> | <b><i>mlh3-DN</i></b> | <b><i>mlh3Δ</i></b> |
|------------------------|-----------|-----------------------|-----------------------|-----------------------|---------------------|
| Number of tetrads      | 10.00     | 7.00                  | 7.00                  | 10.00                 | 10.00               |
| Total E1               | 407.00    | 360.00                | 390.00                | 502.00                | 492.00              |
| E1 per tetrad          | 40.70     | 51.43                 | 55.71                 | 50.20                 | 49.20               |
| E1 length mean         | 1821.22   | 1804.54               | 1748.45               | 1811.19               | 1895.31             |
| E1 length median       | 1464.50   | 1415.75               | 1335.00               | 1482.50               | 1501.00             |
| Total E2               | 728.00    | 485.00                | 407.00                | 519.00                | 501.00              |
| E2 per tetrad          | 72.80     | 69.29                 | 58.14                 | 51.90                 | 50.10               |
| E2 length mean         | 1418.21   | 1530.45               | 1512.03               | 1570.09               | 1775.29             |
| E2 length median       | 1166.00   | 1146.50               | 1153.00               | 1263.00               | 1433.50             |
| E2 length(>0) median   | 1795.00   | 1964.00               | 1842.00               | 1962.00               | 2192.00             |
| Total E3               | 83.00     | 82.00                 | 49.00                 | 71.00                 | 51.00               |
| E3 per tetrad          | 8.30      | 11.71                 | 7.00                  | 7.10                  | 5.10                |
| E3 length mean         | 3154.80   | 3253.14               | 2565.66               | 3588.28               | 3396.47             |
| E3 length median       | 3069.00   | 3036.25               | 2545.50               | 3163.00               | 2870.00             |
| E3 track length mean   | 1254.65   | 1094.16               | 800.45                | 1079.31               | 1258.72             |
| E3 tract length median | 974.00    | 920.50                | 709.00                | 850.25                | 966.50              |
| E3 GC length mean      | 669.32    | 772.35                | 641.97                | 741.70                | 542.78              |
| E3 GC length median    | 340.50    | 304.25                | 189.00                | 331.00                | 0.00                |
| E3 gap length mean     | 1352.59   | 1520.39               | 1247.16               | 1718.63               | 1474.08             |
| E3 gap length median   | 870.50    | 1128.00               | 972.00                | 1488.25               | 1352.00             |
| Total E4               | 20.00     | 22.00                 | 19.00                 | 24.00                 | 13.00               |
| E4 per tetrad          | 2.00      | 3.14                  | 2.71                  | 2.40                  | 1.30                |
| E4 length mean         | 3113.55   | 2924.32               | 2762.08               | 2961.08               | 2514.19             |
| E4 length median       | 3008.00   | 2034.50               | 2227.50               | 2587.00               | 2279.50             |
| E4 track length mean   | 1182.68   | 1006.43               | 806.79                | 810.73                | 907.46              |
| E4 tract length median | 802.00    | 649.50                | 661.50                | 493.50                | 553.50              |
| E4 gap length mean     | 572.66    | 681.32                | 741.15                | 968.88                | 584.50              |
| E4 gap length median   | 440.75    | 484.00                | 520.75                | 701.50                | 276.75              |
| Total E5               | 29.00     | 39.00                 | 27.00                 | 45.00                 | 34.00               |
| E5 per tetrad          | 2.90      | 5.57                  | 3.86                  | 4.50                  | 3.40                |
| E5 length mean         | 3358.71   | 3685.97               | 3389.41               | 3616.73               | 3718.44             |
| E5 length median       | 2438.50   | 3654.50               | 3305.00               | 3682.50               | 3364.00             |
| Total E5A              | 17.00     | 16.00                 | 16.00                 | 23.00                 | 21.00               |
| E5A per tetrad         | 1.70      | 2.29                  | 2.29                  | 2.30                  | 2.10                |
| E5A length mean        | 2550.94   | 3695.19               | 3305.63               | 3260.50               | 3714.02             |
| E5A length median      | 2408.00   | 3350.50               | 3211.25               | 3571.50               | 3360.00             |
| Total E6               | 80.00     | 53.00                 | 40.00                 | 50.00                 | 43.00               |
| E6 per tetrad          | 8.00      | 7.57                  | 5.71                  | 5.00                  | 4.30                |
| E6 length mean         | 3724.04   | 4055.31               | 3863.69               | 3992.64               | 4050.65             |
| E6 length median       | 3199.75   | 3663.00               | 3368.25               | 3520.50               | 3829.00             |
| Total E7               | 10.00     | 5.00                  | 3.00                  | 15.00                 | 8.00                |
| E7 per tetrad          | 1.00      | 0.71                  | 0.43                  | 1.50                  | 0.80                |
| E7 length mean         | 3499.25   | 3163.50               | 4589.33               | 3299.13               | 5029.06             |
| E7 length median       | 3832.00   | 2661.00               | 3392.50               | 3832.00               | 4572.75             |
| Total JM               | 930.00    | 664.00                | 526.00                | 700.00                | 637.00              |
| Total JM per tetrad    | 93.00     | 94.86                 | 75.14                 | 70.00                 | 63.70               |
| Total NCO              | 427.00    | 382.00                | 409.00                | 526.00                | 505.00              |
| Total NCO per tetrad   | 42.70     | 54.57                 | 58.43                 | 52.60                 | 50.50               |
| Total IH               | 1357.00   | 1046.00               | 935.00                | 1226.00               | 1142.00             |
| Total IH per tetrad    | 135.70    | 149.43                | 133.57                | 122.60                | 114.20              |
